# Supplementary material
Source: Research Square preprint supplement (doi:10.21203/rs.3.rs-9545112/v1)

## Supplementary data 1 Particle distribution of PE-oxo (A), PE-pure (B) and Diatomite (C) in function of the size. Percentage written represent the number of particles of the desired size class


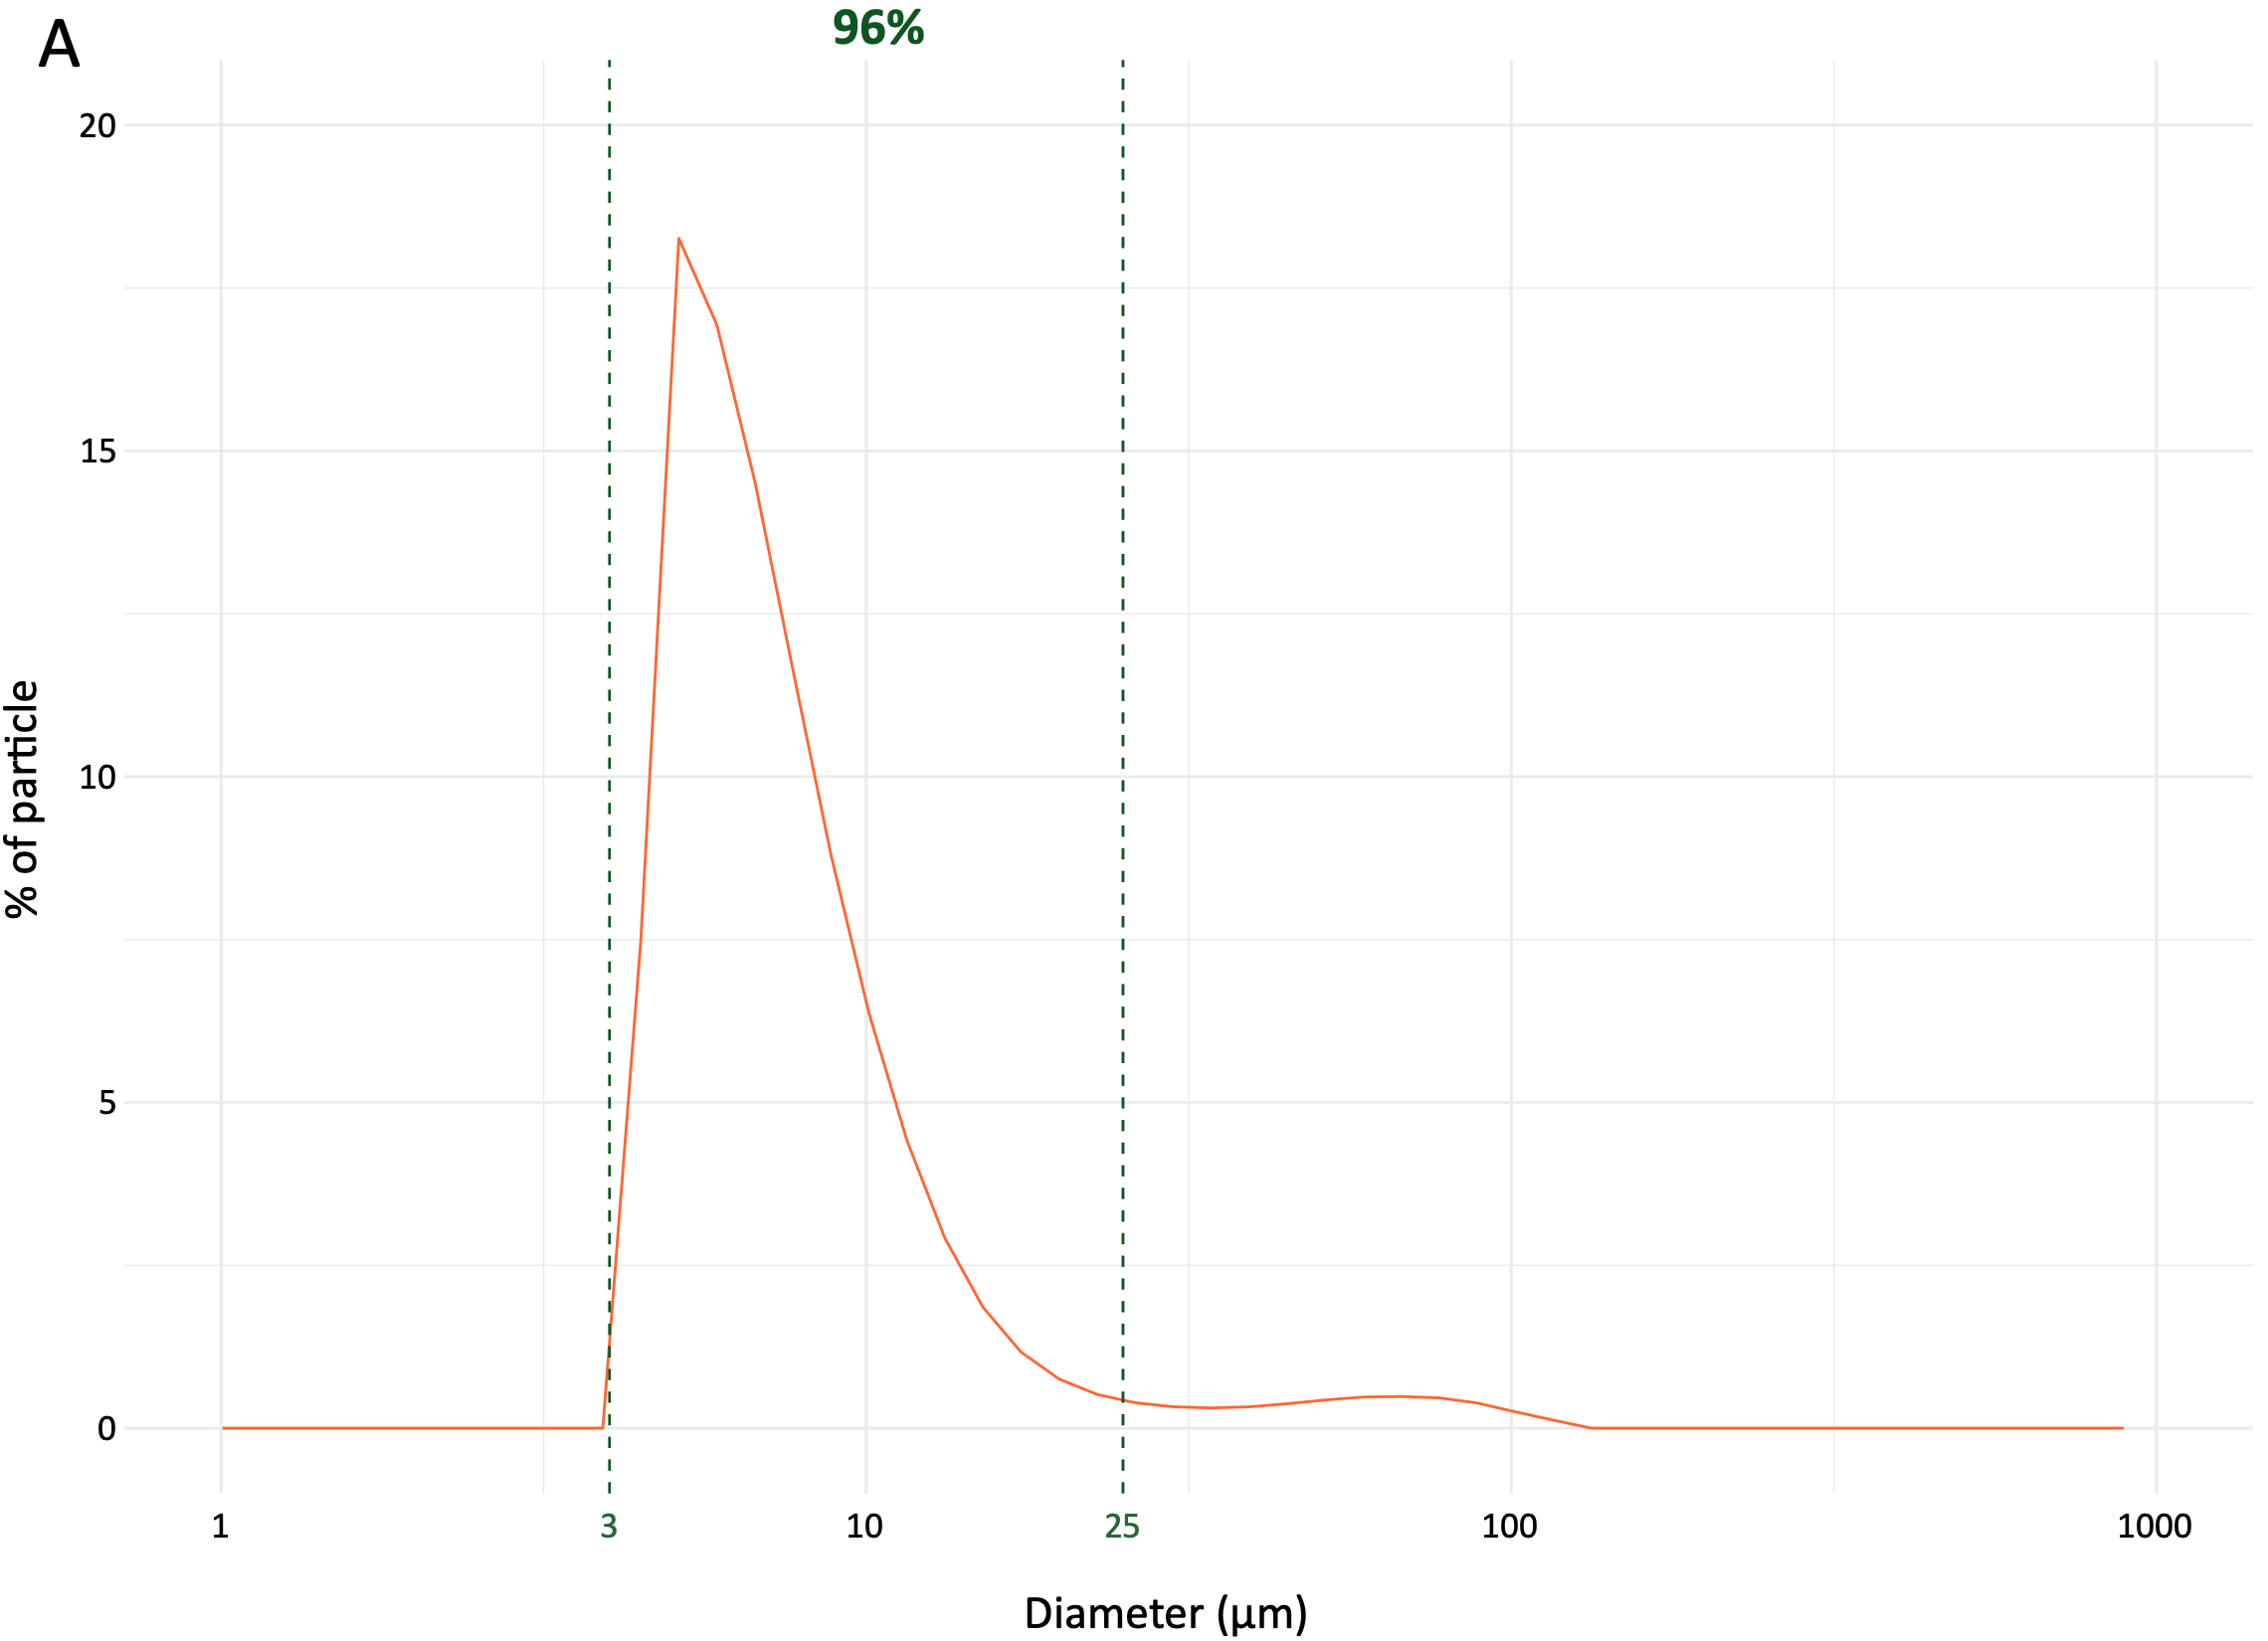


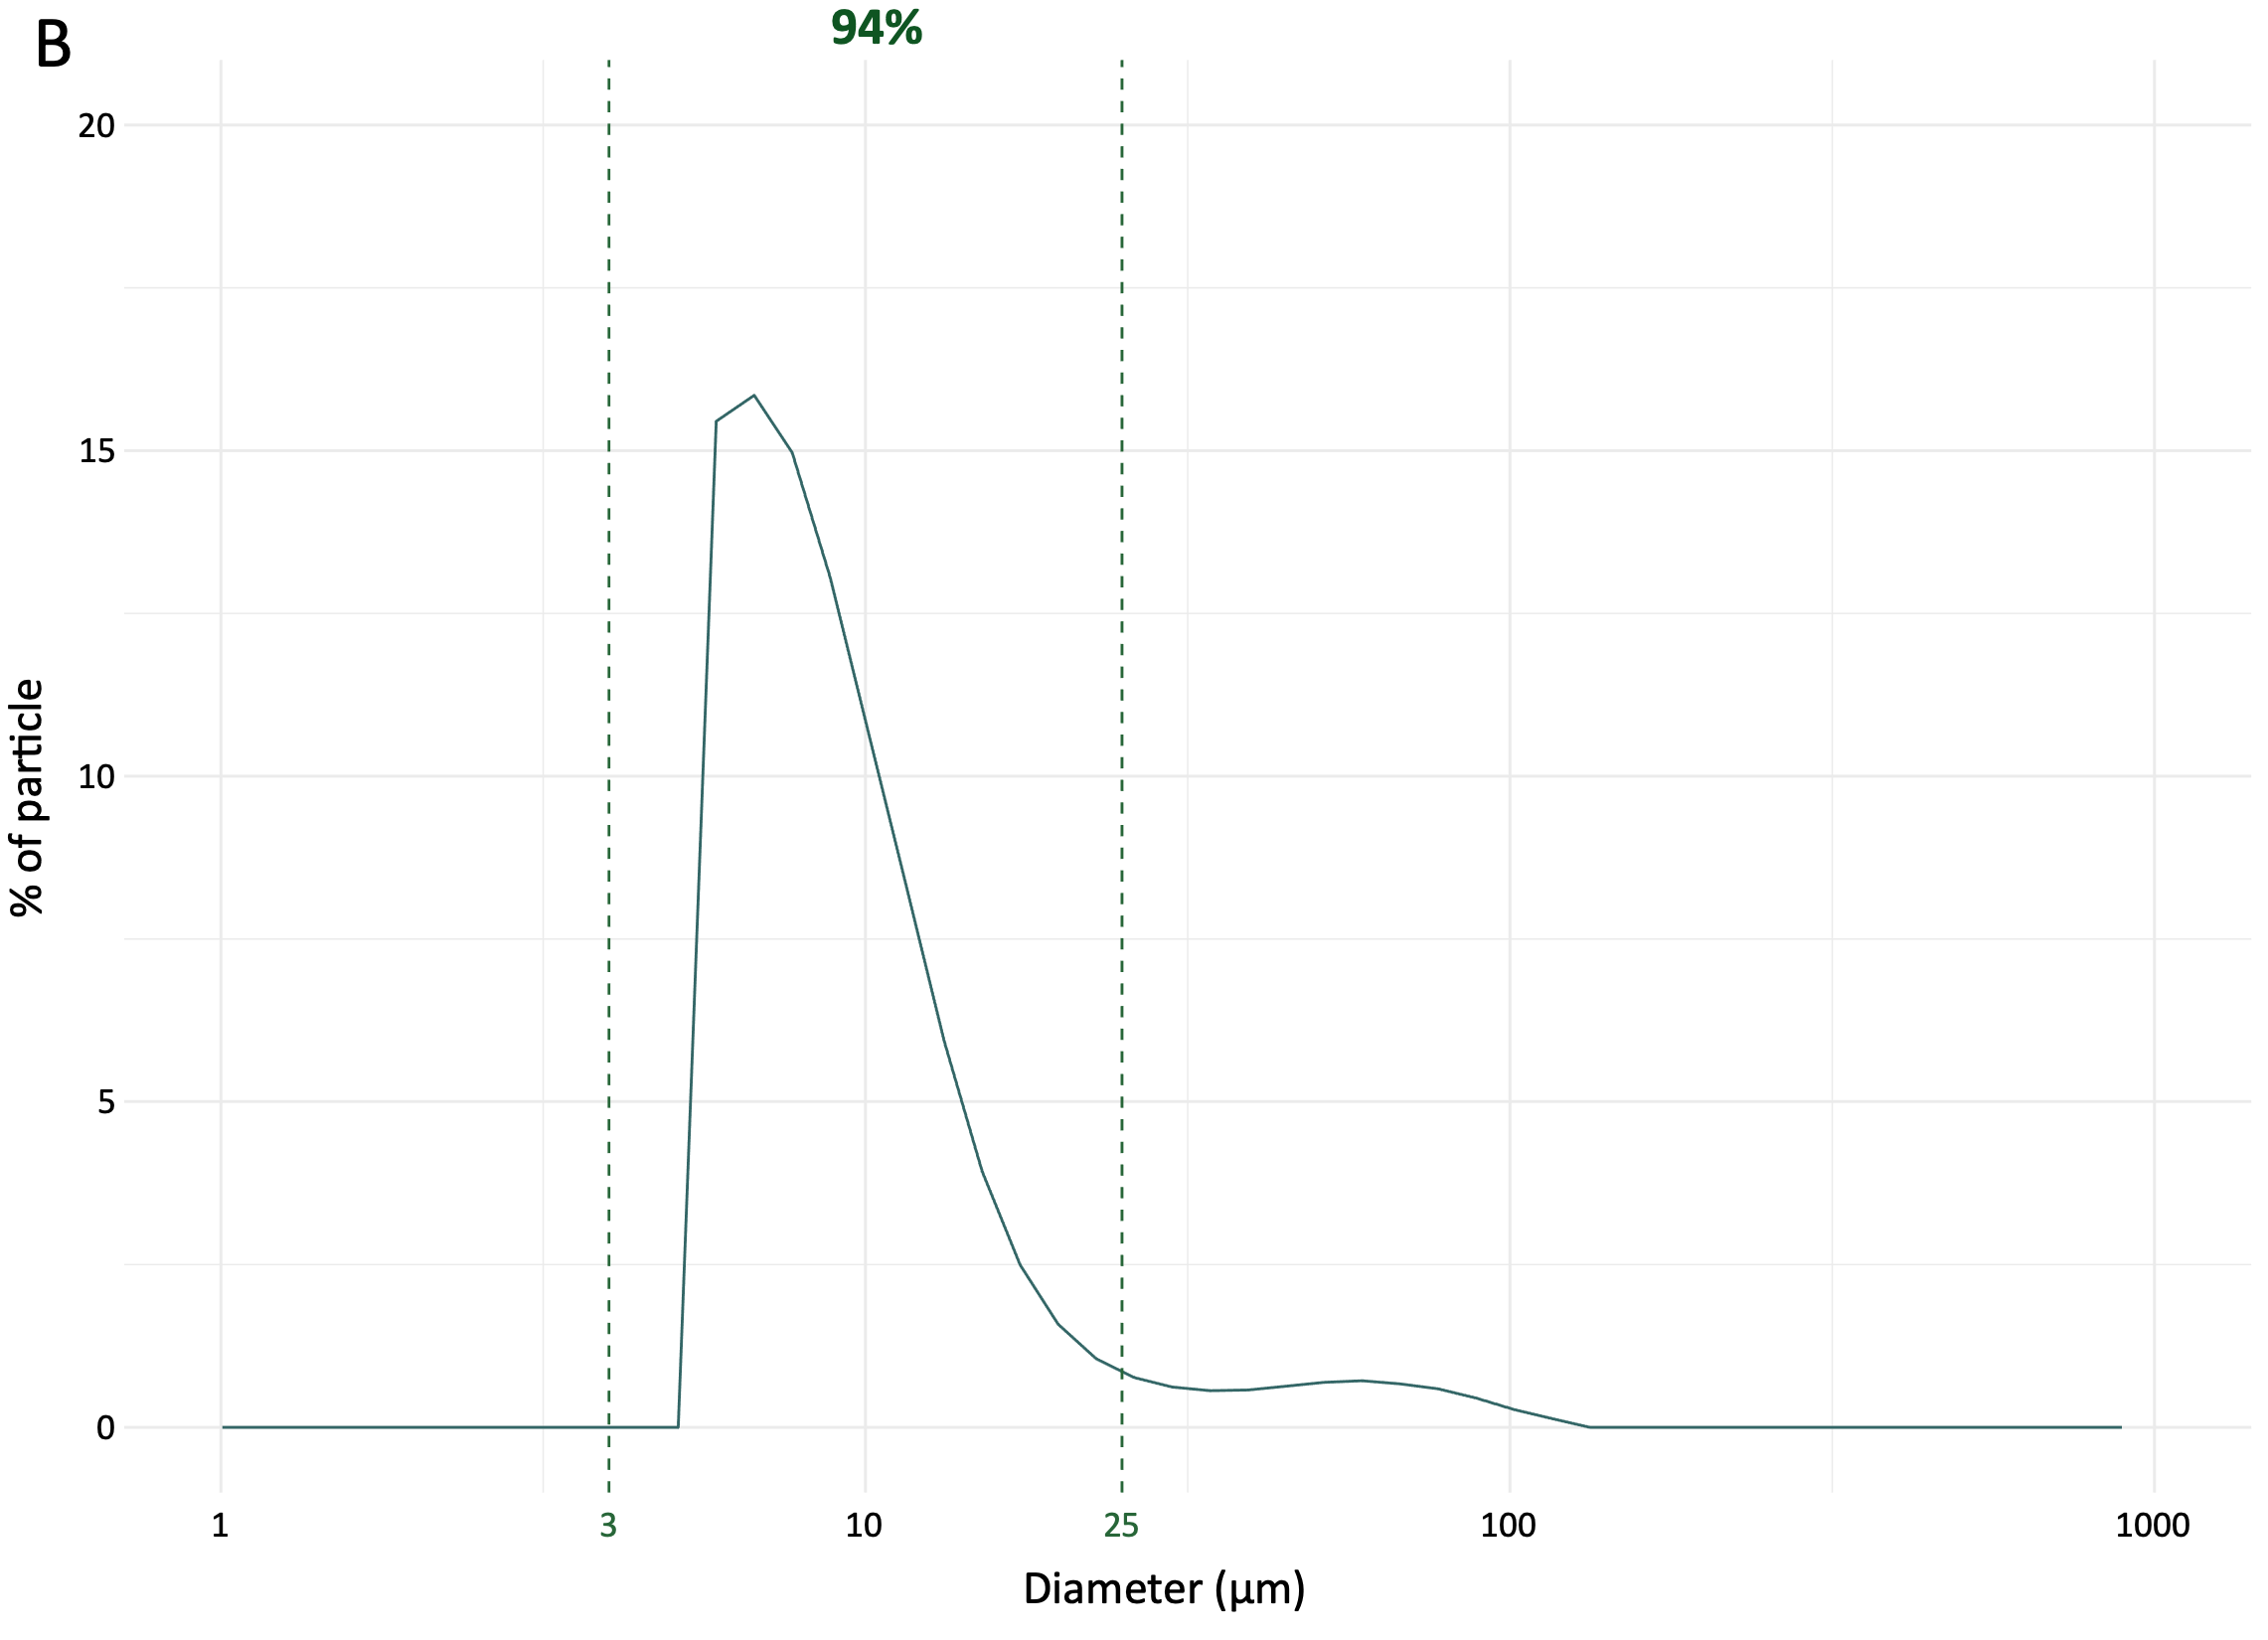


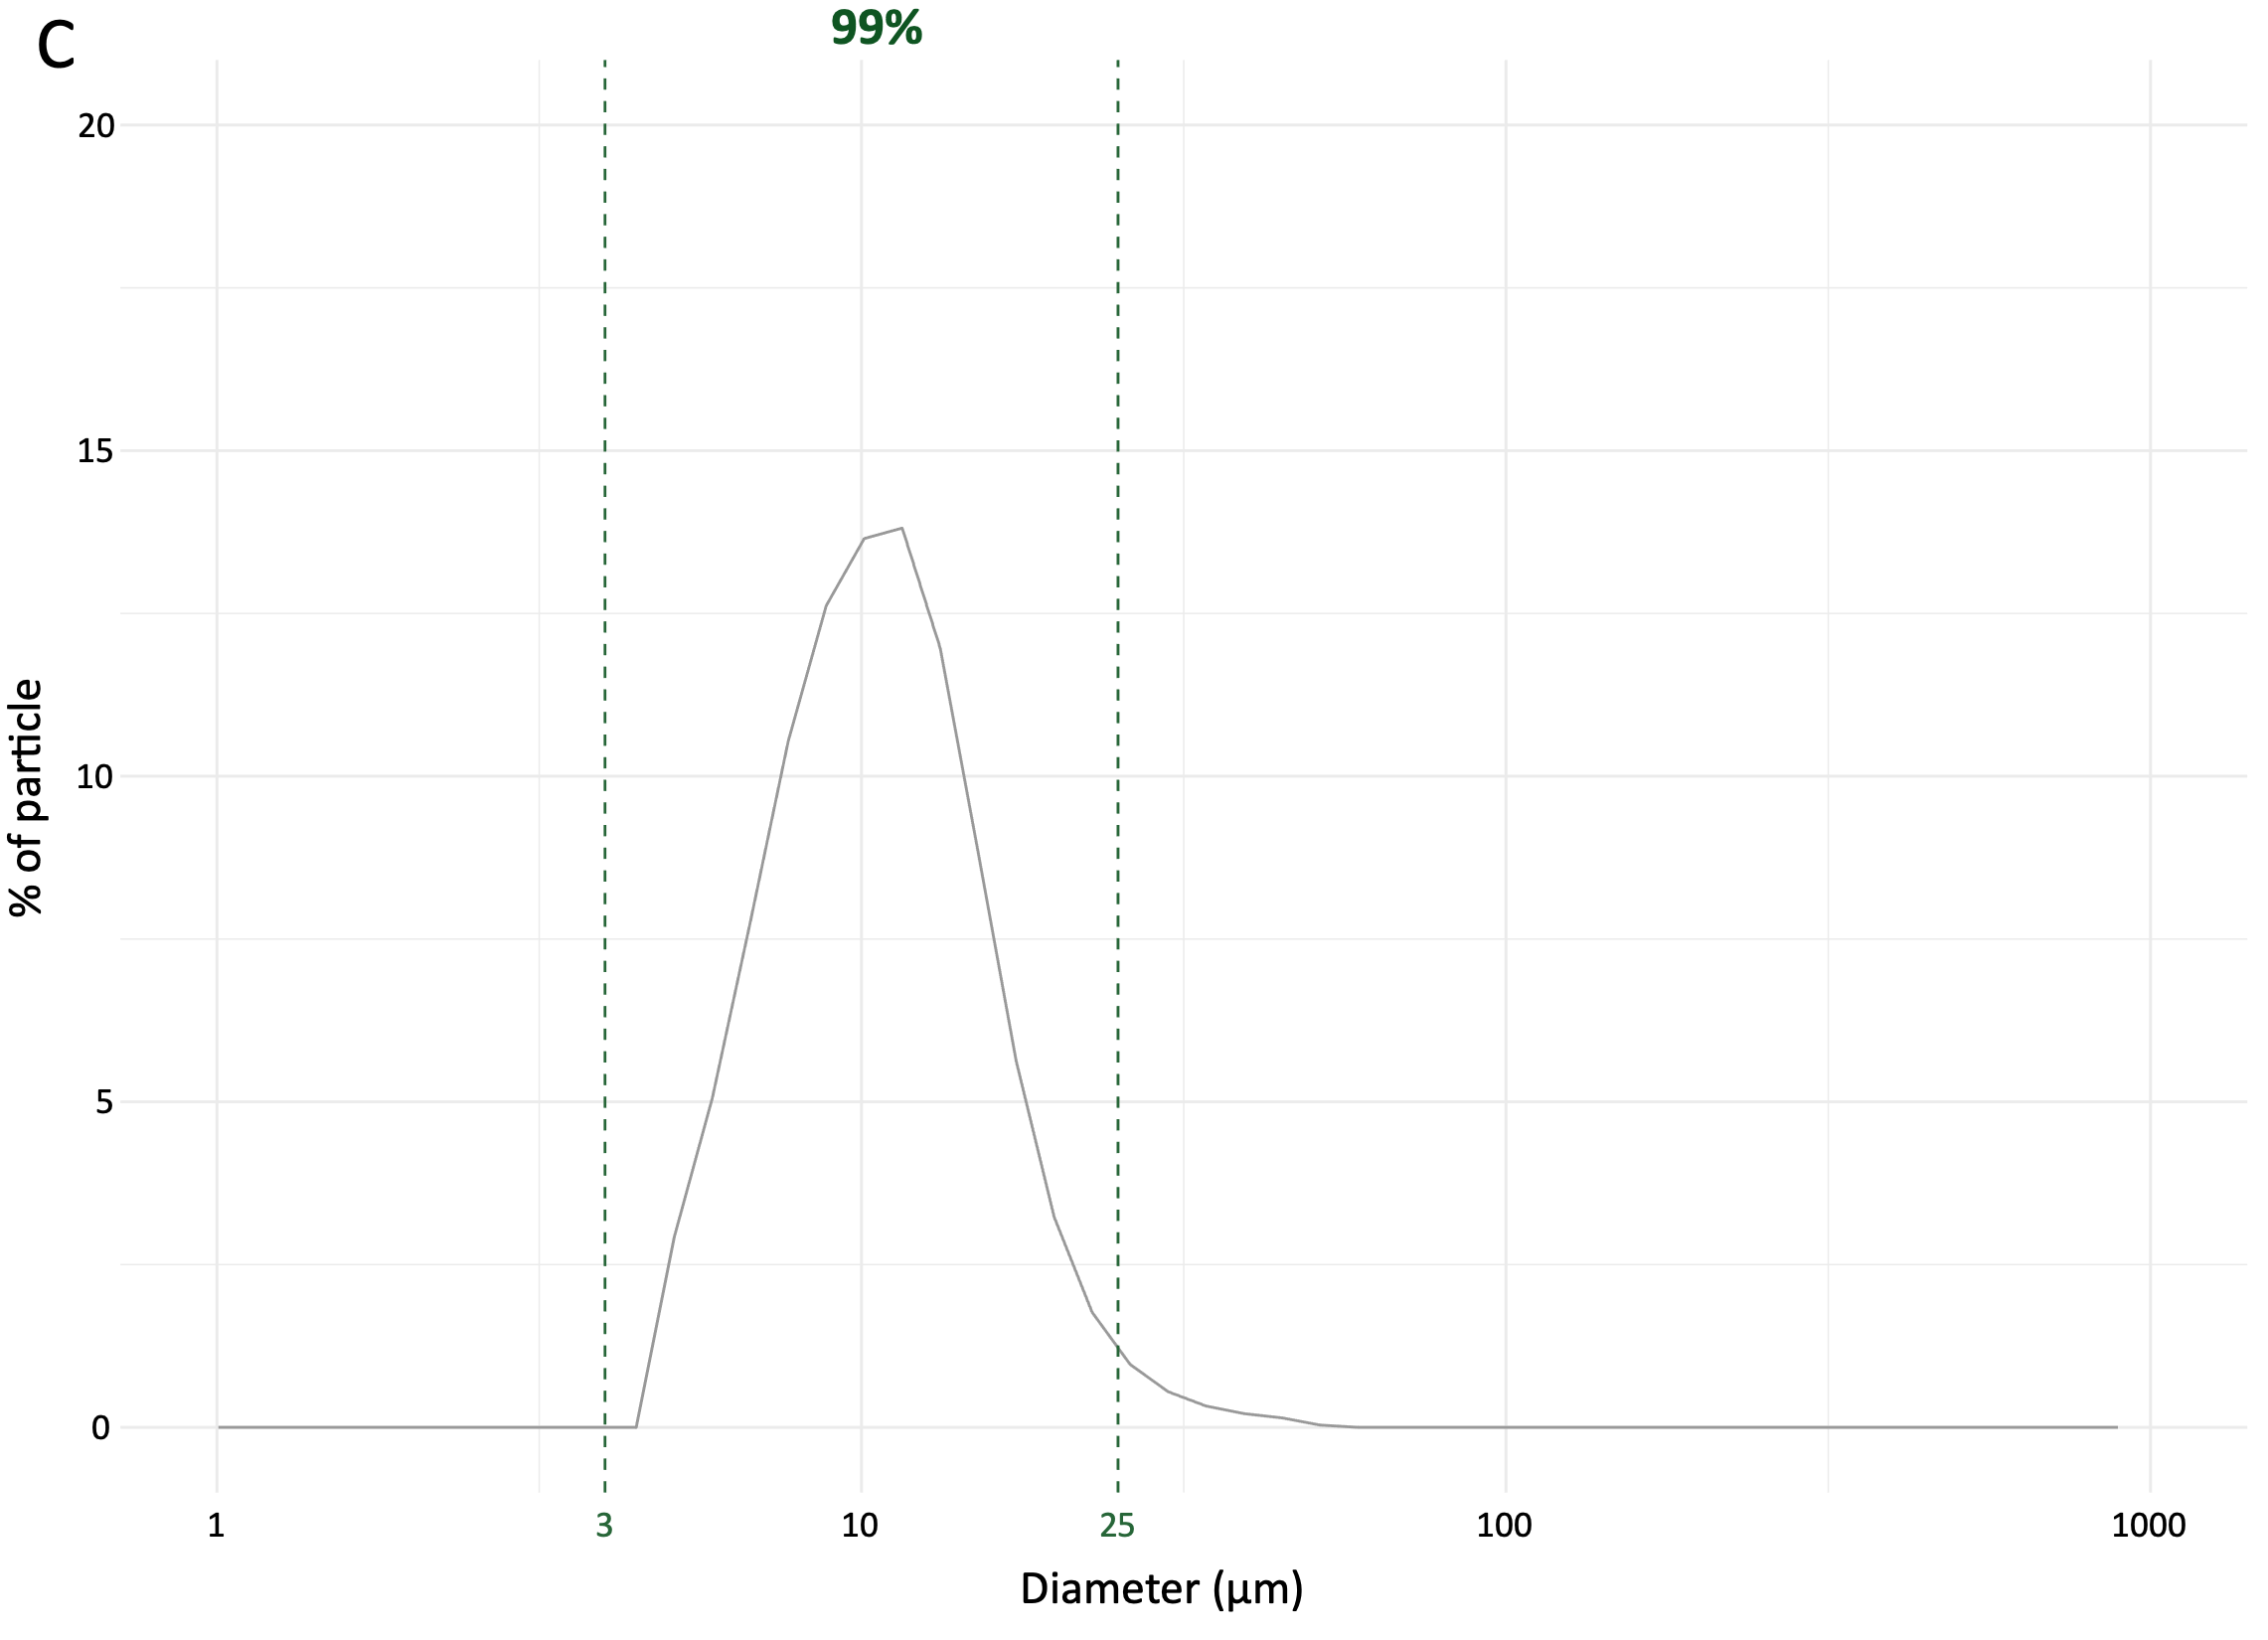

Supplement: Supplementary file 1 [file cf4778f2639aebca20dabc6a.docx]
